# Supplementary material for: Screening and identification of natural ligands of tyrosinase from Pueraria lobata Ohwi by a combination of ultrafiltration and LC-MS
Source: Royal Society of Chemistry journal article supplement (doi:10.1039/c7ay00851a), 2017-01-01
Supplement: c7ay00851a2.pdf [file c7ay00851a2.pdf]

1 Table S1 Characterization of tyrosinase binders in *P. lobata* by HPLC-Q-TOF-MS

| No. | Identification         | Formula                                         | [M+H] <sup>+</sup> | MS <sup>n</sup>                                          |
|-----|------------------------|-------------------------------------------------|--------------------|----------------------------------------------------------|
| 1   | puerarin               | C <sub>21</sub> H <sub>20</sub> O <sub>9</sub>  | 417.1170           | 399.1060 351.0851 297.0747                               |
| 2   | Puerarin-6"-O-xyloside | C <sub>26</sub> H <sub>28</sub> O <sub>13</sub> | 549.1590           | 417.1164                                                 |
| 3   | daidzin                | C <sub>21</sub> H <sub>20</sub> O <sub>9</sub>  | 417.1170           | 255.0642                                                 |
| 4   | 3'-hydroxypuerarin     | C <sub>21</sub> H <sub>20</sub> O <sub>10</sub> | 433.1121           | 415.1009 397.0904 313.0695<br>379.0798 367.0800 337.0694 |
| 5   | genistin               | C <sub>21</sub> H <sub>20</sub> O <sub>10</sub> | 433.1121           | 271.0592                                                 |
| 6   | 6"-O-Acetyldaizidin    | C <sub>23</sub> H <sub>22</sub> O <sub>10</sub> | 459.1277           | 255.0643                                                 |
| 7   | daidzein               | C <sub>15</sub> H <sub>10</sub> O <sub>4</sub>  | 255.0645           | 238.5058 228.0726 200.0779<br>138.0262                   |

2
